# Supplementary material
Source: PubMed Central journal article supplement (PMC9284298)
Supplement: sj-pdf-1-sel-10.1177_17585732211019016.pdf [file sj-pdf-1-sel-10.1177_17585732211019016.pdf]

## Appendix 1

Table showing search strategy used for EMBASE

| EMBASE via Ovid |                                                                                                                                                                                                                                                                                                            |
|-----------------|------------------------------------------------------------------------------------------------------------------------------------------------------------------------------------------------------------------------------------------------------------------------------------------------------------|
| 1               | Shoulder dislocation/                                                                                                                                                                                                                                                                                      |
| 2               | ((shoulder* or glenohumeral or scapulohumeral) adj4 (dislocat* or sublux* or instab* or luxation or apprehen*)).mp. [mp=title, abstract, heading word, drug trade name, original title, device manufacturer, drug manufacturer, device trade name, keyword, floating subheading word, candidate term word] |
| 3               | recurrent shoulder dislocation/                                                                                                                                                                                                                                                                            |
| 4               | 1 or 2 or 3                                                                                                                                                                                                                                                                                                |
| 5               | exp shoulder/                                                                                                                                                                                                                                                                                              |
| 6               | ((shoulder or glenohumeral or scapulohumeral) adj4 joint*).mp. [mp=title, abstract, heading word, drug trade name, original title, device manufacturer, drug manufacturer, device trade name, keyword, floating subheading word, candidate term word]                                                      |
| 7               | 5 or 6                                                                                                                                                                                                                                                                                                     |
| 8               | joint instability/                                                                                                                                                                                                                                                                                         |
| 9               | (instab* or hypermobil* or laxit*).mp. [mp=title, abstract, heading word, drug trade name, original title, device manufacturer, drug manufacturer, device trade name, keyword, floating subheading word, candidate term word]                                                                              |
| 10              | 8 or 9                                                                                                                                                                                                                                                                                                     |
| 11              | 7 and 10                                                                                                                                                                                                                                                                                                   |
| 12              | 4 or 11                                                                                                                                                                                                                                                                                                    |
| 13              | exp brain/                                                                                                                                                                                                                                                                                                 |
| 14              | (brain* or neural or cortex or cortical or somatosensory).mp. [mp=title, abstract, heading word, drug trade name, original title, device manufacturer, drug manufacturer, device trade name, keyword, floating subheading word, candidate term word]                                                       |
| 15              | tactile discrimination.mp. [mp=title, abstract, heading word, drug trade name, original title, device manufacturer, drug manufacturer, device trade name, keyword, floating subheading word, candidate term word]                                                                                          |
| 16              | graph?esthesia.mp. [mp=title, abstract, heading word, drug trade name, original title, device manufacturer, drug manufacturer, device trade name, keyword, floating subheading word, candidate term word]                                                                                                  |
| 17              | tactile acuity.mp. [mp=title, abstract, heading word, drug trade name, original title, device manufacturer, drug manufacturer, device trade name, keyword, floating subheading word, candidate term word]                                                                                                  |
| 18              | cortical reorgani?ation.mp. [mp=title, abstract, heading word, drug trade name, original title, device manufacturer, drug manufacturer, device trade name, keyword, floating subheading word, candidate term word]                                                                                         |
| 19              | 13 or 14 or 15 or 16 or 17 or 18                                                                                                                                                                                                                                                                           |
| 20              | 12 and 19                                                                                                                                                                                                                                                                                                  |

Search strategy for EMBASE database
